# Supplementary material for: The ATP Synthase Subunits FfATPh, FfATP5, and FfATPb Regulate the Development, Pathogenicity, and Fungicide Sensitivity of Fusarium fujikuroi
Source: Int J Mol Sci. 2023 Aug 26;24(17):13273. doi: 10.3390/ijms241713273 (PMC10487771; doi:10.3390/ijms241713273)
Supplement: Supplementary file 1 [file ijms-24-13273-s001.zip › Table S1.pdf]

Table S1 Primers used in this study

| Primer          | Sequence (5'-3')                                         | Relevant characteristics                              |
|-----------------|----------------------------------------------------------|-------------------------------------------------------|
| FfATPh-UF       | GAGGAGTTGTCAGCCATGTTC                                    | PCR primers to amplify FfATPh upstream fragment       |
| FfATPh-UR       | CTTCAATATCATCTTCTGTTTTG<br>AATGGCTGGTGGTG                |                                                       |
| FfATPh-DF       | AGGAGACAATACCGGAAGGAAC<br>AGCGTTTTTCTTAACCTTTGGG         | PCR primers to amplify FfATPh downstream fragment     |
| FfATPh-DR       | CATGTGGGTACGGATGTCT                                      |                                                       |
| FfATPh-inF      | TGTTTCTCGTGTCGCCAGA                                      | PCR primers to verify the target fragment of FfATPh   |
| FfATPh-inR      | CCTCAAGCCAGTCAGCAA                                       |                                                       |
| FfATPh-csF      | ACTGCGTACATCATCGCAT                                      | PCR primers to amplify FfATPh mutant vector           |
| FfATPh-csR      | TGCATTGATCGTCGAACTGT                                     |                                                       |
| FfATPh-TZ-F     | CAACATTGATGCAACAACCTGT<br>A                              | PCR primers to amplify FfATPh probe                   |
| FfATPh-TZ-R     | CGATGGTGCATGTAACCAAGGA<br>TTTCGTAGGAACCCAATCTTCAA        |                                                       |
| FfATPh-RP-F     | AATGCTCATTCAACTCTCCAGG<br>GTGAACAGCTCCTCGCCCTTGCT        | Constructed FfATPh-GFP fusion vector                  |
| FfATPh-RP-R     | CACGTGGTGAGGCTCATCCTC<br>GCGAATTGGGTACTCAAATTGG          |                                                       |
| FfATPh-65-F     | TGCACTTGCTATCACATCTTCT<br>GCTCACCATCGTGGCGATGGAG         | Constructed FfATPh-PHZ65 fusion vector                |
| FfATPh-65-R     | CGGTGGTGAGGCTCATCCTC<br>GCGAATTGGGTACTCAAATTGG           |                                                       |
| FfATPh-68-F     | TGCACTTGCTATCACATCTTCT<br>GTTCTGGGATCTTGACAGGCAGGG       | Constructed FfATPh-PHZ68 fusion vector                |
| FfATPh-68-R     | CGGTGGTGAGGCTCATCCTC<br>ACAGAAGATGATATTGAAGGAG           |                                                       |
| SS-F            | C                                                        | PCR primers to amplify Double sieve fragment          |
| SS-R            | G TTCCTTCCGGTATTGTCTCCT<br>TTTCGTAGGAACCCAATCTTCAA       |                                                       |
| FfATPh-NFlag-F  | AATGGATTACAAGGATGACGAC<br>GATA                           | PCR primers to constructe FfATPh-3xflag fusion vector |
| FfATPh-NFlag-F1 | GATTACAAGGATGACGACGATA<br>AGGACTATAAGGACGATGATGA         |                                                       |
| FfATPh-NFlag-F2 | CAAG<br>GACTATAAGGACGATGATGACA<br>AGGACTACAAAGATGATGACGA |                                                       |
| FfATPh-NFlag-F3 | TAAA<br>GACTACAAAGATGATGACGATA<br>AACTCATTCAACTCTCCAGG   |                                                       |
| FfATPh-NFlag-R  | GTGAACAGCTCCTCGCCCTTGCT                                  |                                                       |

| Primer      | Sequence (5'-3')                                 | Relevant characteristics                               |
|-------------|--------------------------------------------------|--------------------------------------------------------|
|             | CACTTAGTGGTGAGGCTCATCCT                          |                                                        |
|             | C                                                |                                                        |
| FfATP5-UF   | ATCACCGAGTTCTGCTCACC                             | PCR primers to amplify FfATP5<br>upstream fragment     |
| FfATP5-UR   | CTTCAATATCATCTTCTGTGACG<br>GCGGCTTCTTTGAC        |                                                        |
| FfATP5-DF   | AGGAGACAATACCGGAAGGAAC                           | PCR primers to amplify FfATP5<br>downstream fragment   |
| FfATP5-DR   | AACCACCAACATAGTATAC                              |                                                        |
| FfATP5-inF  | GCCGCCTTCCTCATACTCCT                             | PCR primers to verify the target<br>fragment of FfATP5 |
| FfATP5-inR  | GTTGATGGCACTTATGCTAC                             |                                                        |
| FfATP5-csF  | GATGGTATGGTCTAGACATA                             | PCR primers to amplify FfATP5<br>mutant vector         |
| FfATP5-csR  | CAACTCATGTCATGGGTGCA                             |                                                        |
| FfATP5-TZ-R | ACTCTGGTATGCCTCGCATC                             | PCR primers to amplify FfATP5<br>probe                 |
| FfATP5-TZ-R | GACTACTTGGATTGCTGGATGA                           |                                                        |
| FfATP5-65-F | CTGATTGCTCGCATGATTCATG                           | Constructed FfATP5-PHZ65<br>fusion vector              |
| FfATP5-65-R | GCGAATTGGGTACTCAAATTGG<br>GTTTGACCAGCCATGAAATTC  |                                                        |
| FfATP5-68-F | GCTCACCATCGTGGCGCAGAGT<br>GTCCGTGAGGAG           | Constructed FfATP5-PHZ68<br>fusion vector              |
| FfATP5-68-R | GCGAATTGGGTACTCAAATTGG<br>GTTTGACCAGCCATGAAATTC  |                                                        |
| FfATP5-RP-F | GTTTCGGGATCCTGCAGGCAGGG<br>CGCAGAGTGTCCTGAGGAG   | Constructed FfATP5-GFP fusion<br>vector                |
| FfATP5-RP-R | TTTCGTAGGAACCCAATCTTCAA<br>AATGTTCTCGCGACAGGTTCT |                                                        |
| FfATPb-UF   | GTGAACAGCTCCTCGCCCTTGCT<br>CACCAGAGTGTCCTGAGGAG  | PCR primers to amplify FfATPb<br>upstream fragment     |
| FfATPb-UR   | AATCAGAGGCGACTTACTTG                             |                                                        |
| FfATPb-DF   | CTTCAATATCATCTTCTGTTGTG<br>GGATGGTTCGTGAT        | PCR primers to amplify FfATPb<br>downstream fragment   |
| FfATPb-DR   | AGGAGACAATACCGGAAGGAAC<br>ATAATTAAACGCCGCCGC     |                                                        |
| FfATPb-inF  | AGTACTGGGTAGACTTGCCA                             | PCR primers to verify the target<br>fragment of FfATPb |
| FfATPb-inR  | CTCCTTATATGTAGGCGCTC                             |                                                        |
| FfATPb-csF  | CTCTCAATATCCGCAACACT                             | PCR primers to amplify FfATPb<br>mutant vector         |
| FfATPb-csR  | TGTGTACTCGTCCTTGTCAT                             |                                                        |
| FfATPb-TZ-F | AGCAATGTTCTGAACAGTCAG                            | PCR primers to amplify FfATPb<br>probe                 |
| FfATPb-TZ-R | GTGTCATAACAACACCTGTGC<br>TCGTCAAGTATCCTGCTTTACG  |                                                        |

| Primer            | Sequence (5'-3')        | Relevant characteristics                                 |
|-------------------|-------------------------|----------------------------------------------------------|
| FfATPb-RP-F       | TTTCGTAGGAACCCAATCTTCAA | Constructed FfATPb-GFP fusion<br>vector                  |
|                   | AATGGCGTCACGCTTGGTAC    |                                                          |
| FfATPb-RP-R       | GTGAACAGCTCCTCGCCCTTGCT |                                                          |
|                   | CACTTGGGCCTTGGAGGCAAC   |                                                          |
|                   | GGCGAATTGGGTACTCAAATTG  |                                                          |
| FfATPb-Flag-ZS-F  | GTTGATGTTGTAGGAATGCTTCG |                                                          |
|                   | TG                      |                                                          |
|                   | CTTATCGTCGTCATCCTTGTAAT |                                                          |
| FfATPb-3xflag-UR1 | CTTGGGCCTTGGAGGCAACGAT  |                                                          |
|                   | C                       |                                                          |
|                   | CTTGTCATCATCGTCCTTATAGT | PCR primers to constructe<br>FfATPb-3xflag fusion vector |
| FfATPb-3xflag-UR2 | CCTTATCGTCGTCATCCTTGTA  |                                                          |
|                   | TC                      |                                                          |
|                   | CTATTATCGTCATCATCTTTGT  |                                                          |
| FfATPb-3xflag-UR3 | AGTCCTTGTCATCATCGTCCTTA |                                                          |
|                   | TAG                     |                                                          |
|                   | ACAGCTCCTCGCCCTTGCTC    |                                                          |
| FfATPb-3xflag-UR4 | ACCTATTTATCGTCATCATCTTT |                                                          |
|                   | G                       |                                                          |
| FfATPb-56-F       | GCGAATTGGGTACTCAAATTGG  | Constructed<br>FfATPb-PHZ65 fusion vector                |
|                   | GATGTTGTAGGAATGCTTCGTG  |                                                          |
| FfATPb-65-R       | GCTCACCATCGTGGCGTTGGGCC |                                                          |
|                   | TTGGAGGCAAC             |                                                          |
|                   | GCGAATTGGGTACTCAAATTGG  | Constructed                                              |
| FfATPb-56-F       | GATGTTGTAGGAATGCTTCGTG  |                                                          |
|                   | GTTTCGGGATCTTGCAGGCAGGG | FfATPb-PHZ68 fusion vector                               |
| FfATPb-68-R       | CGTTGGGCCTTGGAGGCAAC    |                                                          |
